# Supplementary material for: Impact of Extended Use of Ablation Techniques in Cirrhotic Patients with Hepatocellular Carcinoma: A Cost-Effectiveness Analysis
Source: MDPI journal article supplement (doi:10.3390/cancers14112634), 2022-05-26
Supplement: s1 [file s1]

## **SUPPLEMENTARY MATERIAL**

### **Impact of extended use of ablation techniques in cirrhotic patients with hepatocellular carcinoma: a cost-effectiveness analysis**

# Table of Contents

## Markov Model

|                                                                                                                           |    |
|---------------------------------------------------------------------------------------------------------------------------|----|
| Figure S1. Simplified state transition model illustrating the progression of the disease and possible interventions.....  | 4  |
| Figure S2. Markov model of cirrhotic patient with HCC treated by hepatic resection in first-line strategy.....            | 5  |
| Figure S3. Markov model of cirrhotic patient with HCC treated by ablation in first-line strategy.....                     | 6  |
| Figure S4. Markov model of cirrhotic patient with HCC treated by TACE in first-line strategy.....                         | 7  |
| Figure S5. Markov model of cirrhotic patient with HCC treated by Sorafenib in first-line strategy.....                    | 8  |
| Table S1. Transition probabilities of cirrhotic patient with HCC treated by hepatic resection in first-line strategy..... | 9  |
| Table S2. Transition probabilities of cirrhotic patient with HCC treated by ablation in first-line strategy.....          | 10 |
| Table S3. Transition probabilities of cirrhotic patient with HCC treated by TACE in first-line strategy.....              | 11 |
| Table S4. Transition probabilities of cirrhotic patient with HCC treated by Sorafenib in first-line strategy.....         | 12 |
| Figure S6. Model calibration by first-line treatments in the (A) Bondy and the (B) SOC group.....                         | 13 |

## Propensity score Analysis

|                                                                                              |    |
|----------------------------------------------------------------------------------------------|----|
| Table S5. Characteristics of variables including in the model used for propensity score..... | 15 |
|----------------------------------------------------------------------------------------------|----|

|                                                                                      |    |
|--------------------------------------------------------------------------------------|----|
| Figure S7. Balance assessment on the covariates after propensity score matching..... | 16 |
|--------------------------------------------------------------------------------------|----|

## **Costs Evaluation**

|                                                                                                             |    |
|-------------------------------------------------------------------------------------------------------------|----|
| Table S6. Costs of in-patient HCC treatment from PMSI.....                                                  | 17 |
| Table S7. Costs of pre-operative examinations.....                                                          | 18 |
| Table S8. Direct medical costs of out-patient HCC treatment.....                                            | 19 |
| Table S9. Costs of follow-up surveillance after curative or palliative treatment.....                       | 20 |
| Table S10. Costs of in-patient follow-up (care after liver transplantation, palliative care) from PMSI..... | 21 |
| Table S11. Direct medical costs of HCC management from French Insurance.....                                | 22 |
| Table S12. Results of the cost-effectiveness analyses, by first-line treatment on a 5-year horizon.....     | 23 |
| Figure S8. Results of the deterministic univariate analysis.....                                            | 24 |

## Markov Model

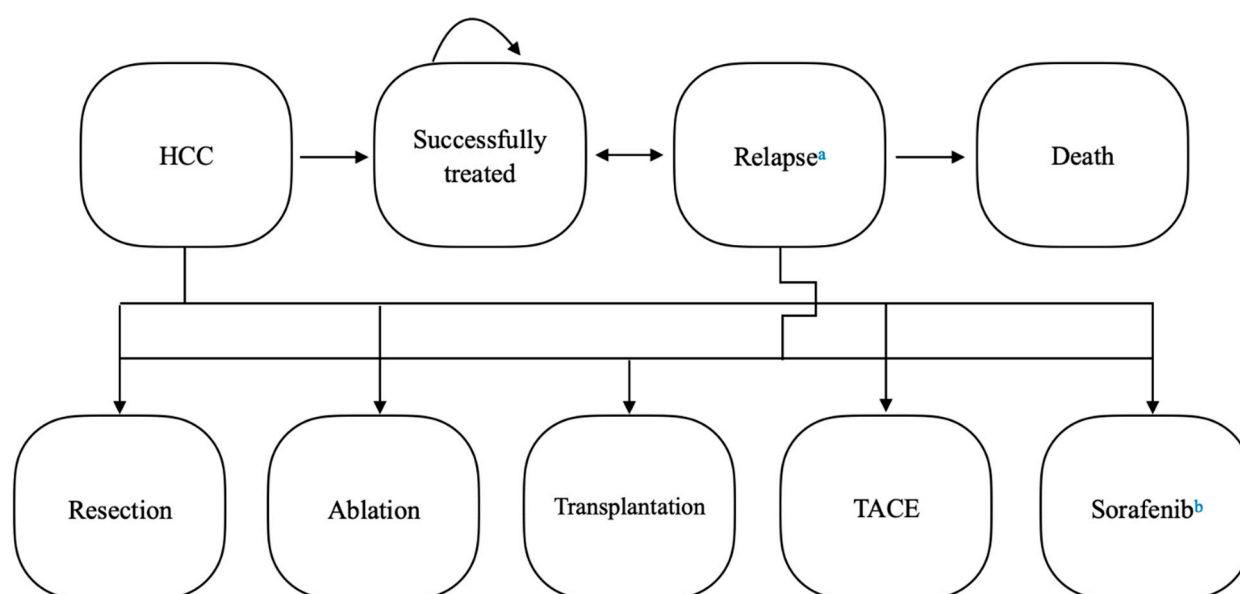

**Figure S1. Simplified state transition model illustrating the progression of the disease and possible interventions.**

<sup>a</sup>Recurrence refers to development of new HCC lesions, relapse at the site of previous treatment, or non-response, necessitating repeated treatment at least 3 months after the previous one or switching to another treatment modality.

<sup>b</sup>TARE and Sorafenib are combined into one group. HCC, Hepatocellular carcinoma; TACE, trans-arterial chemoembolization; TARE, trans-arterial radioembolization.

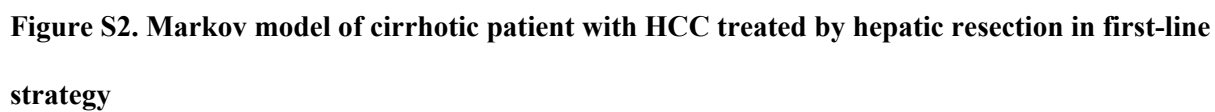

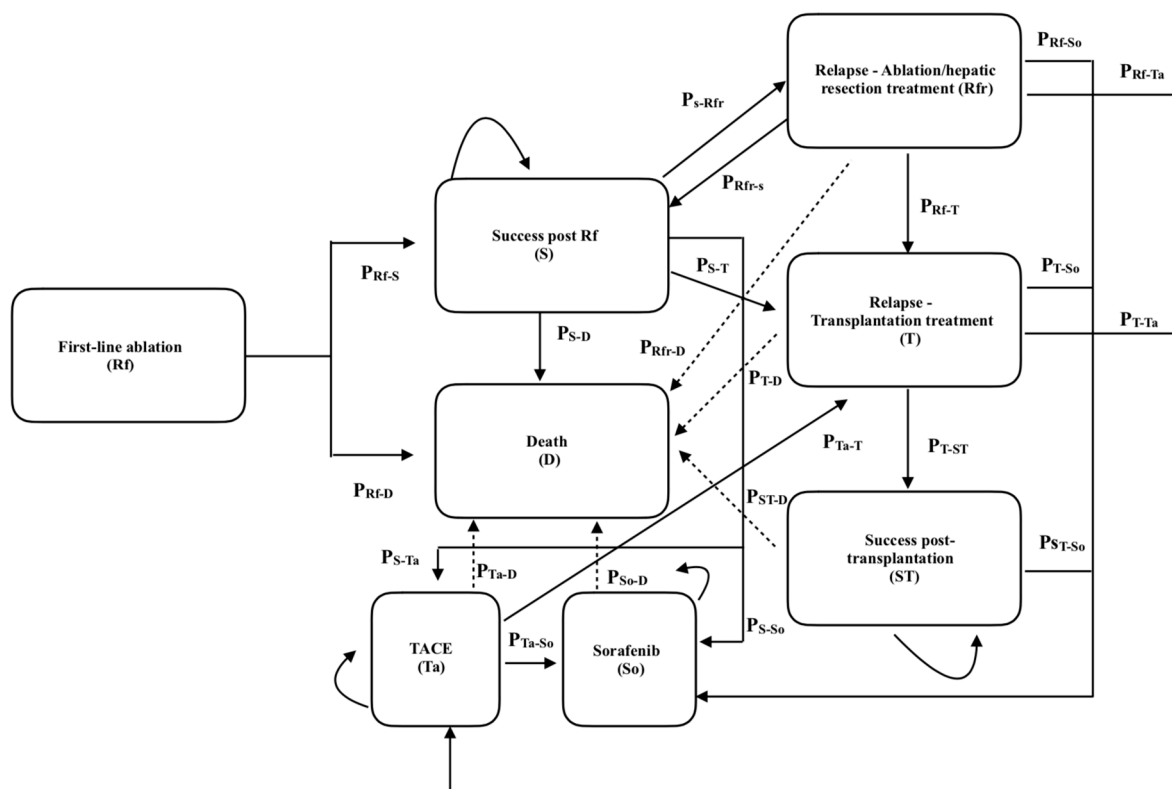

Figure S3. Markov model of cirrhotic patient with HCC treated by ablation in first-line strategy.

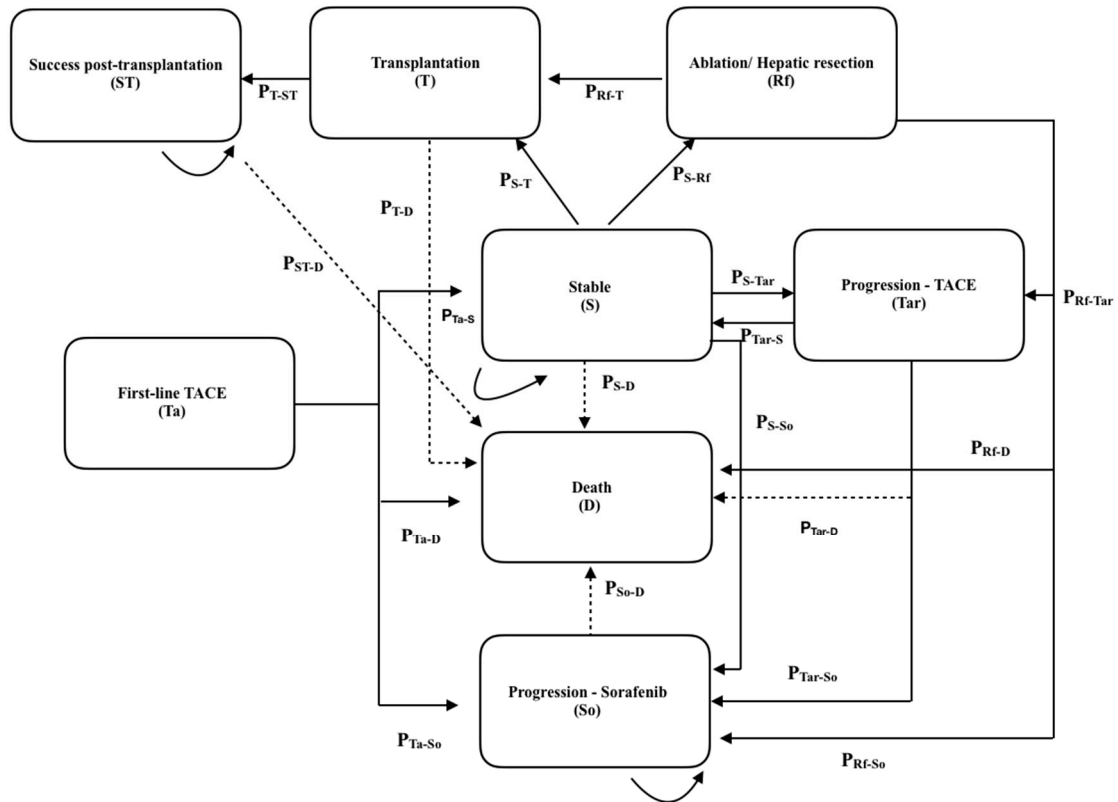

Figure S4. Markov model of cirrhotic patient with HCC treated by TACE in first-line strategy.

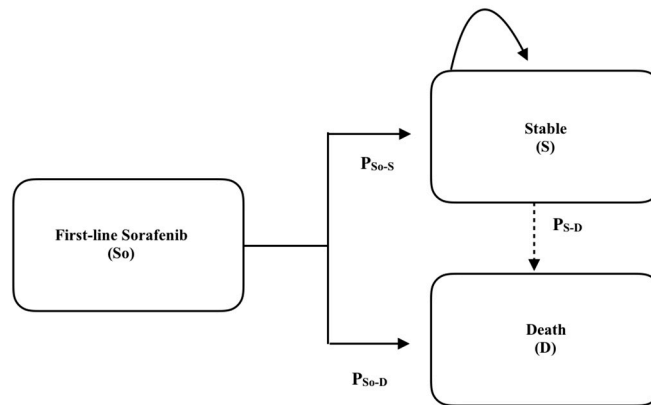

**Figure S5. Markov model of cirrhotic patient with HCC treated by Sorafenib in first-line strategy**



**Table S1. Transition probabilities of cirrhotic patient with HCC treated by hepatic resection in first-line strategy**

| <b>Transition probabilities</b> | <b>Bondy group</b> | <b>SOC group</b> |
|---------------------------------|--------------------|------------------|
| p(He-D)                         | 0.00%              | 0.00%            |
| p(S-Rfr)                        | 4.73%              | 4.73%            |
| p(S-T)                          | 0.00%              | 0.00%            |
| p(S-So)                         | 0.00%              | 0.00%            |
| p(S-D)                          | 2.99%              | 2.99%            |
| p(S-Ta)                         | 0.00%              | 0.00%            |
| p(Rfr-T)                        | 14.13%             | 14.13%           |
| p(Ta-T)                         | 0.00%              | 0.00%            |
| p(ST-So)                        | 0.00%              | 0.00%            |
| p(ST-D)                         | 0.00%              | 0.00%            |
| p(Rfr-D)                        | 0.00%              | 0.00%            |
| p(T-D)                          | 0.00%              | 0.00%            |
| p(Rfr-So)                       | 0.00%              | 0.00%            |
| p(T-So)                         | 0.00%              | 0.00%            |
| p(Rfr-Ta)                       | 0.00%              | 0.00%            |
| p(T-Ta)                         | 0.00%              | 0.00%            |
| p(So-D)                         | 0.00%              | 0.00%            |
| p(STa-D)                        | 4.73%              | 4.73%            |
| p(STa-Ta)                       | 0.00%              | 0.00%            |
| P(STa-So)                       | 0.00%              | 0.00%            |
| p(Ta-So)                        | 2.99%              | 2.99%            |
| p(Ta-D)                         | 0.00%              | 0.00%            |

**Table S2. Transition probabilities of cirrhotic patient with HCC treated by ablation in first-line strategy**

| <b>Transition probabilities</b> | <b>Bondy group</b> | <b>SOC group</b> |
|---------------------------------|--------------------|------------------|
| p(Rf-D)                         | 1.11%              | 0.93%            |
| p(S-Rfr)                        | 12.89%             | 12.60%           |
| p(S-T)                          | 0.73%              | 0.61%            |
| p(S-So)                         | 1.25%              | 1.52%            |
| p(S-D)                          | 4.97%              | 4.50%            |
| p(S-Ta)                         | 2.05%              | 2.01%            |
| p(Rfr-T)                        | 0.87%              | 0.73%            |
| p(Ta-T)                         | 0.00%              | 0.00%            |
| p(ST-So)                        | 2.70%              | 2.61%            |
| p(ST-D)                         | 5.26%              | 5.09%            |
| p(Rfr-D)                        | 1.27%              | 1.77%            |
| p(T-D)                          | 0.00%              | 0.00%            |
| p(Rfr-So)                       | 0.85%              | 1.08%            |
| p(T-So)                         | 0.00%              | 0.00%            |
| p(Rfr-Ta)                       | 0.87%              | 0.73%            |
| p(T-Ta)                         | 0.00%              | 0.00%            |
| p(So-D)                         | 34.34%             | 30.62%           |
| p(STa-D)                        | 10.67%             | 9.14%            |
| p(STa-Ta)                       | 7.54%              | 5.65%            |
| P(STa-So)                       | 3.10%              | 3.56%            |
| p(Ta-So)                        | 3.56%              | 2.56%            |
| p(Ta-D)                         | 0.00%              | 0.00%            |

**Table S3. Transition probabilities of cirrhotic patient with HCC treated by TACE in first-line strategy**

| <b>Transition probabilities</b> | <b>Bondy group</b> | <b>SOC group</b> |
|---------------------------------|--------------------|------------------|
| p(Ta-D)                         | 1.69%              | 1.59%            |
| p(Ta-So)                        | 1.69%              | 0.35%            |
| p(S-RF)                         | 12.30%             | 3.13%            |
| p(RF-S)                         | 22.84%             | 17.92%           |
| p(RF-T)                         | 0.00%              | 0.00%            |
| p(S-T)                          | 0.00%              | 3.67%            |
| p(T-D)                          | 0.00%              | 3.55%            |
| p(ST-D)                         | 0.00%              | 1.20%            |
| p(RF-Tar)                       | 0.00%              | 0.00%            |
| p(RF-Sor)                       | 3.85%              | 0.00%            |
| p(S-D)                          | 12.29%             | 8.67%            |
| p(So-D)                         | 56.05%             | 26.52%           |
| p(S-Tar)                        | 15.61%             | 16.00%           |
| p(Tar-So)                       | 9.44%              | 4.61%            |
| p(Tar-D)                        | 8.63%              | 3.85%            |
| p(S-So)                         | 8.31%              | 6.76%            |

**Table S4. Transition probabilities of cirrhotic patient with HCC treated by Sorafenib in first-line strategy**

| <b>Transition probabilities</b> | <b>Bondy group</b> | <b>SOC group</b> |
|---------------------------------|--------------------|------------------|
| p(So-D)                         | 34.72%             | 7.14%            |
| p(S-D)                          | 38.47%             | 27.96%           |

### A. Bondy group

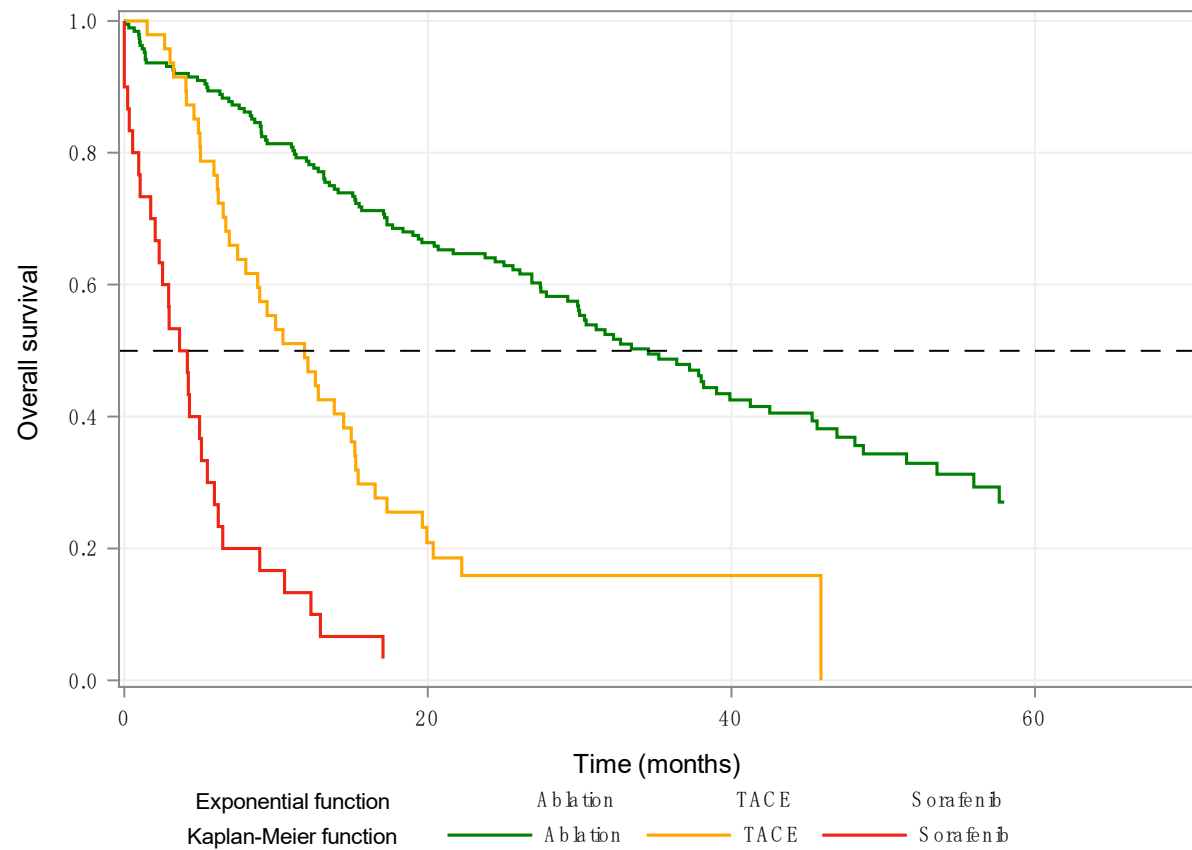

### B. SOC group

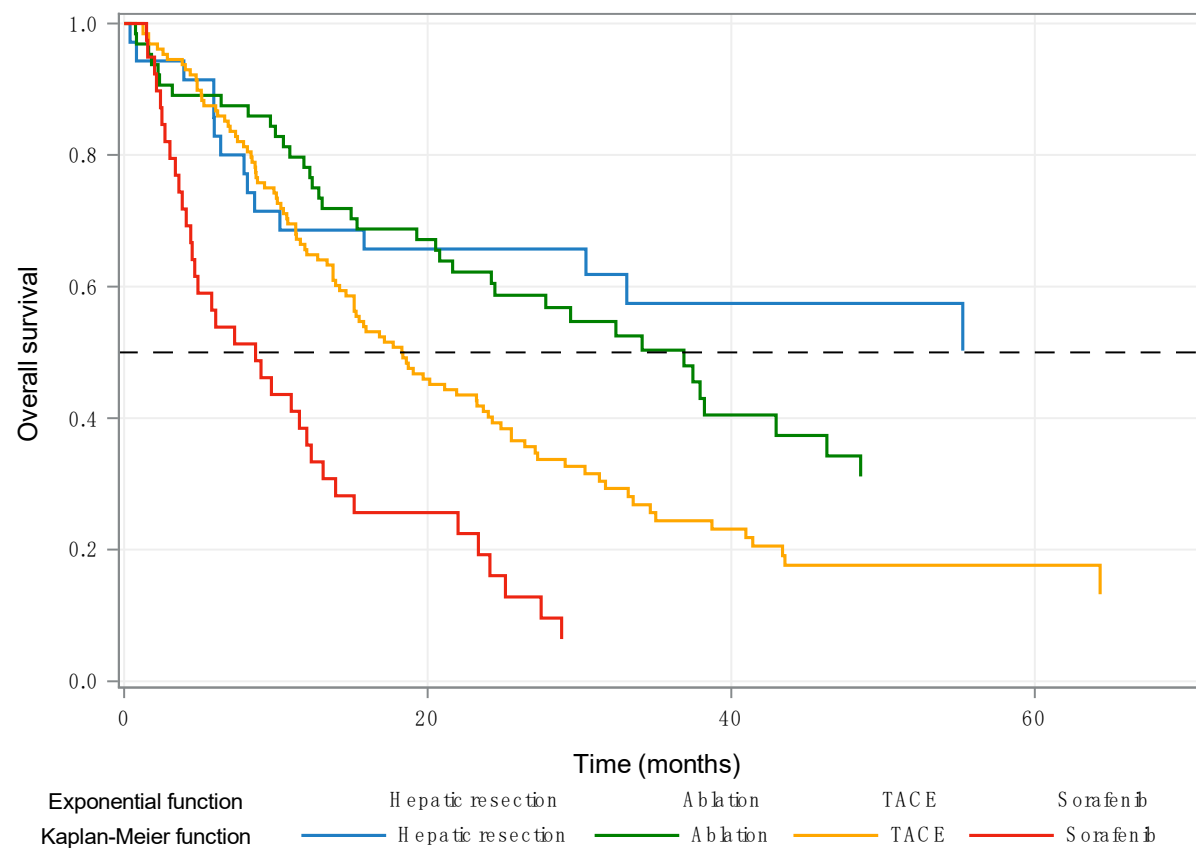

**Figure S6. Model calibration by first-line treatment in the (A) Bondy and (B) SOC.** Dash lines represent the Markov model results (derived from exponential function) while segmented lines represent patient-level data (Kaplan-Meier function)

## Propensity Score Analysis

$$P(z_i=1|X_i) = b_0 + b_1 \times \text{age} + b_2 \times \text{gender} + b_3 \times \text{comorbidity\_index} + b_4 \times \text{cause\_of\_cirrhosis} + b_5 \times \text{pugh\_child\_score} + b_6 \times \text{tumor\_size} + b_7 \times \text{number\_of\_tumor} + b_8 \times \text{vascular\_invasion} + b_9 \times \text{htp\_signs} + b_{10} \times \text{location} + b_{11} \times \text{afp}$$

where,

$z_i$ , the probability between 0 and 1 of group assignment assumption derived from the logit model,

$b_0$ , the intercept,

$b_i$ , regression coefficients estimated by maximum likelihood,

$X_i$ , the set of variables (age, sex, Pugh-Child score, number of tumors...).

**Table S5. Characteristics of variables including in the model used for propensity score**

| Set of variables               | Type       | Values                                                    | Reference  |
|--------------------------------|------------|-----------------------------------------------------------|------------|
| Age                            | Continuous | 31-92                                                     | -          |
| Gender                         | Binary     | Male<br>Female                                            | Female     |
| Comorbidity index              | Ordinal    | $\leq 1$<br>$> 1$                                         | $\leq 1$   |
| Cause of cirrhosis             | Category   | Alcoholic<br>Hepatitis C<br>Hepatitis B<br>NASH<br>Others | Others     |
| Child-Pugh score               | Binary     | A<br>B                                                    | B          |
| Size of the largest tumor (mm) | Continuous | 0-220                                                     | -          |
| Number of tumor                | Ordinal    | Unique (=1)<br>Oligo (2-3)<br>Multi ( $\geq 4$ )          | Multi      |
| Vascular invasion              | Binary     | Present<br>Absent                                         | Absent     |
| HTP signs                      | Binary     | Present<br>Absent                                         | Absent     |
| Location                       | Binary     | Unilobar<br>Bilobar                                       | Unilobar   |
| AFP                            | Ordinal    | $\leq 100$<br>100-1000<br>$> 1000 \text{ ng/mL}$          | $\leq 100$ |

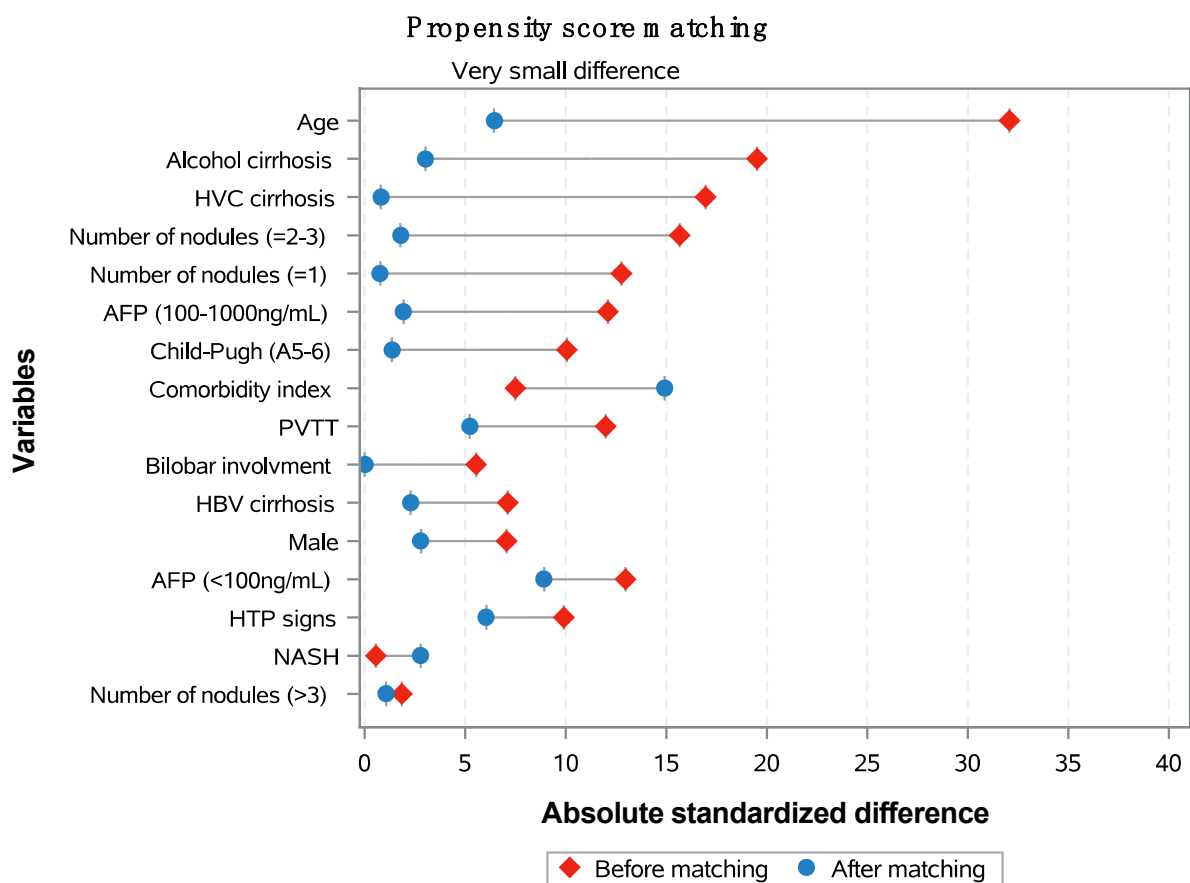

**Figure S7. Balance assessment on the covariates after propensity score matching**



## Costs Evaluation

**Table S6. Costs of in-patient HCC treatment from PMSI.** Costs are valued in Euro.

| <b>In-patient<br/>HCC<br/>treatment</b> | <b>N (n)</b>   | <b>Mean</b> | <b>SD</b>   | <b>Minimum</b> | <b>Maximum</b> | <b>IC 95-</b> | <b>IC 95+</b> |
|-----------------------------------------|----------------|-------------|-------------|----------------|----------------|---------------|---------------|
| Hepatic resection                       | 976<br>(976)   | 17 129.77 € | 10 764.35 € | 7 543.21 €     | 160 357.05 €   | 16 454.44 €   | 17 805.10 €   |
| Ablation                                | 1549<br>(1714) | 3 939.35 €  | 5 117.75 €  | 413.93 €       | 160 357.05 €   | 3 684.49 €    | 4 194.21 €    |
| Liver transplantation                   | 343<br>(343)   | 51 252.89 € | 22 015.90 € | 21 130.20 €    | 176 167.11 €   | 48 922.95 €   | 53 582.83 €   |
| TACE                                    | 2486<br>(3470) | 3 705.61 €  | 3 443.79 €  | 404.58 €       | 70 480.60 €    | 3 570.23 €    | 3 840.99 €    |
| Care after liver transplantation        | 16<br>(70)     | 10 528.43 € | 20 273.21 € | 712.16 €       | 95 193.01 €    | 594.56 €      | 20 462.30 €   |
| Palliative care                         | 89<br>(133)    | 4 343.64 €  | 2 474.60 €  | 714.56 €       | 20 579.54 €    | 3 829.52 €    | 4 857.76 €    |

N (n)=Number of patients (number of distinct treatments, patient may have received multiple procedures). SD, Standard deviation. IC 95-/+ : Confidence interval 95%.

**Table S7. Costs of pre-operative examinations.** Costs are valued in Euro.

| <b>Pre-operative examinations</b> | <b>Cost per unit</b> | <b>Sources</b> |
|-----------------------------------|----------------------|----------------|
| Hepatologist consultation         | 28.00 €              | AMELI          |
| Liver ultrasonography             | 52.45 €              | AMELI          |
| Liver MRI                         | 69.00 €              | AMELI          |
| Liver CT-scan                     | 50.54 €              | AMELI          |
| Liver biopsy                      | 196.18 €             | AMELI          |
| Nurse consultation                | 4.26 €               | Micro-costing  |
| Multidisciplinary meeting         | 91.96 €              | Micro-costing  |
| Anesthetic consultation           | 46.00 €              | AMELI          |
| Biology                           | 50.83 €              | Biolam         |

AMELI : <https://www.ameli.fr/accueil-de-la-ccam/index.php>; Biolam : <https://www.ameli.fr/l-assurance-maladie/statistiques-et-publications/donnees-statistiques/actes-de-biologie-medicale/biolam/biolam-2013-2015.php>

**Table S8. Direct medical costs of out-patient HCC treatment.** Costs are valued in Euro.

| Out-patient treatment          | Cost per unit | Sources |
|--------------------------------|---------------|---------|
| Cortancyl 5mg (SANOFI AVENTIS) | 1.85 €        | CEPS    |
| Advagraf 5mg (ASTELLAS PHARMA) | 298.28 €      | CEPS    |
| Cellcept 500mg (ROCHE)         | 55.73 €       | CEPS    |
| Sorafenib 200mg (BAYER)        | 3 261.64 €    | CEPS    |

CEPS: Comité Economique des Produits de Santé, <http://medicprix.sante.gouv.fr/medicprix>.

**Table S9. Costs of follow-up surveillance after curative or palliative treatment.** Costs are valued in Euro.

| Follow-up examinations    | Cost per unit | Sources |
|---------------------------|---------------|---------|
| Hepatologist consultation | 28.00 €       | AMELI   |
| Liver ultrasonography     | 52.45 €       | AMELI   |
| Liver MRI                 | 69.00 €       | AMELI   |
| Liver CT-scan             | 50.54 €       | AMELI   |
| Biology                   | 50.83 €       | Biolam  |

AMELI : <https://www.ameli.fr/accueil-de-la-ccam/index.php>; Biolam : <https://www.ameli.fr/l-assurance-maladie/statistiques-et-publications/donnees-statistiques/actes-de-biologie-medicale/biolam/biolam-2013-2015.php>

**Table S10. Costs of in-patient follow-up (care after liver transplantation, palliative care) from PMSI. Costs are valued in Euro.**

| <b>In-patient follow-up</b> | <b>N (n)</b> | <b>Mean</b> | <b>SD</b>   | <b>Minimum</b> | <b>Maximum</b> | <b>IC 95-</b> | <b>IC 95+</b> |
|-----------------------------|--------------|-------------|-------------|----------------|----------------|---------------|---------------|
| Care after LT               | 16<br>(70)   | 10 528.43 € | 20 273.21 € | 712.16 €       | 95 193.01 €    | 594.56 €      | 20 462.30 €   |
| Palliative care             | 89<br>(133)  | 4 343.64 €  | 2 474.60 €  | 714.56 €       | 20 579.54 €    | 3 829.52 €    | 4 857.76 €    |

N (n)=Number of patients (number of distinct treatments, patient may have received multiple procedures). SD, Standard deviation. IC 95-/+ : Confidence interval 95%.

LT, liver transplantation.

**Table S11. Direct medical costs of HCC management from French Insurance.** Costs are valued in Euro.

| Health states             | Pre<br>operative<br>examinations <sup>a</sup> | In-patient<br>procedures | Follow-up<br>exams <sup>b</sup> | Outpatient<br>medications <sup>c</sup> | Average total<br>(3-months cycle) |
|---------------------------|-----------------------------------------------|--------------------------|---------------------------------|----------------------------------------|-----------------------------------|
| Transplantation           | 536 €                                         | 51 253 €                 | -                               | -                                      | 51 789 €                          |
| Resection                 | 536 €                                         | 17 130 €                 | -                               | -                                      | 17 666 €                          |
| Ablation                  | 536 €                                         | 4 359 €                  | -                               | -                                      | 4 895 €                           |
| TACE                      | 536 €                                         | 5 172 €                  | -                               | -                                      | 5 708 €                           |
| Sorafenib                 | 536 €                                         | -                        | -                               | 5 870 € <sup>d</sup>                   | 6 407 €                           |
| Death                     | -                                             | -                        | -                               | -                                      | 0 €                               |
| Follow-up after LT        | -                                             | 134 € <sup>e</sup>       | 79 €                            | 1 301 € <sup>f</sup>                   | 1 515 €                           |
| Follow-up after resection | -                                             | -                        | 146 €                           | -                                      | 146 €                             |
| Follow-up after ablation  | -                                             | -                        | 146 €                           | -                                      | 146 €                             |
| Follow-up after TACE      | -                                             | 232 € <sup>g</sup>       | 146 €                           | -                                      | 379 €                             |

<sup>a</sup>Pre-operative examinations include specialist consultation in hepatology, liver ultrasound, abdominal CT-scan or MRI, liver biopsy, multidisciplinary consultation meeting, anesthesia consultation and biological exams. <sup>b</sup>Follow-up exams include specialist consultation, biology exams, and a CT scan or a liver MRI. <sup>c</sup>2.1% VTA rate was applied. <sup>d</sup>Compliance rate of Sorafenib was 60% of daily planned dose in SHARP trial. This rate was applied to the cost of outpatient medications. <sup>e</sup>In-patient procedure refers to « Care after liver transplantation » DRG. <sup>f</sup>Outpatients medications after liver transplantation were immunosuppressive drugs (Cortancyl®, Advagraf® and Cellcept®). <sup>g</sup>In-patient procedure refers to « Palliative care » DRG. TACE, trans-arterial chemoembolization; LT, liver transplantation.

**Table S12. Results of the cost-effectiveness analyses, by first-line treatment on a 5-year horizon.**

These results were weighted by the probabilities of each first-line treatment in the Bondy and standard of care groups and used to calculate the final ICER. The respective mixes of first-line treatments in each group used to estimate the average ICER came from the cohort distribution.

| Probability of first-line treatment |  | Bondy group |  | SOC group |  |
|-------------------------------------|--|-------------|--|-----------|--|
| Hepatic resection                   |  | 0.4 %       |  | 13.2 %    |  |
| Ablation                            |  | 70.7 %      |  | 24.0 %    |  |
| TACE                                |  | 17.7 %      |  | 48.1 %    |  |
| Sorafenib                           |  | 11.2 %      |  | 14.7 %    |  |

  

| First-line           | Costs and                 | Bondy group        | SOC group          | Net effects         | ICER<br>(€/LYG) |
|----------------------|---------------------------|--------------------|--------------------|---------------------|-----------------|
|                      | life-years<br>per patient |                    |                    |                     |                 |
| Hepatic<br>resection | Cost                      | €101 (\$111)       | €3,513 (\$3,864)   | €-3,412 (\$-3,753)  |                 |
|                      | Life-years                | 0.1                | 1.7                | -2.5                |                 |
| Ablation             | Cost                      | €12,187 (\$13,406) | €4,101 (\$4,511)   | €8,086 (\$8,895)    |                 |
|                      | Life-years                | 7.7                | 2.7                | 7.3                 |                 |
| TACE                 | Cost                      | €2,266 (\$2,493)   | €12,098 (\$13,308) | €-9,832 (\$-10,815) |                 |
|                      | Life-years                | 0.7                | 3.5                | -3.6                |                 |
| Sorafenib            | Cost                      | €1,322 (\$1,454)   | €2,694 (\$2,963)   | €-1,372 (\$-1,509)  |                 |
|                      | Life-years                | 0.2                | 0.5                | -0.3                |                 |
| Average<br>total     | Cost                      | €15,876 (\$17,464) | €22,406 (\$24,647) | €-6,530 (\$-7,183)  | <b>Dominant</b> |
|                      | Life-years                | 8.7                | 8.4                | 0.3                 |                 |

Costs and life years are expressed as average for a patient and were discounted by 3%. The net effect could be a reduction in costs (negative values) or an increase in costs (positive values).

TACE, trans-arterial chemoembolization; ICER, incremental cost-effectiveness ratio; LYG, life-years gained.

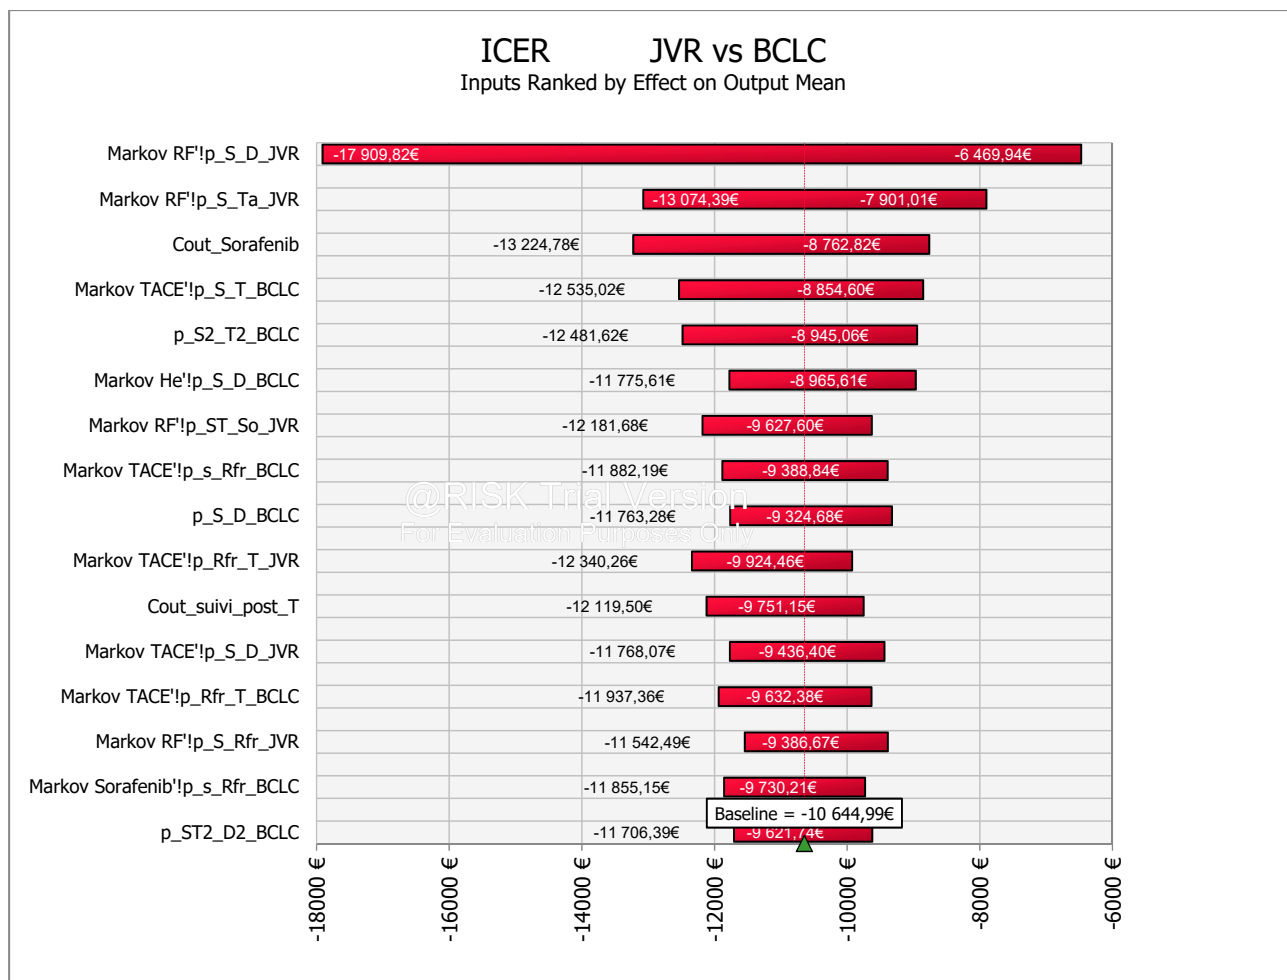

**Figure S8. Results of the deterministic univariate analysis.**
